# Supplementary material
Source: HighWire-hosted journal article supplement (doi:10.1101/rna.078693.121)
Supplement: Supplemental_Legends.docx [file Supplemental_Legends.docx]

**Table S1. Statistics comparing fluorescent protein ratios in NOS-3 deletion mutants**

**Table S2: Strains examined in this study**

**Table S3: CRISPR RNAs and repair templates**

**Table S4: smFISH probes**

**Figure S1.** Supplemental data showing that tethered NOS-3 enhances reporter expression. **(A)** Schematic of the bicistronic GFP and mCherry dual reporter. An adult pan-germline promoter (*mex-5*) drives expression of one nascent transcript that resolves with trans-splicing to generate two mRNAs: one encoding GFP::OLLAS::histone H2B::PEST domain::3x boxB::*tbb-2* 3’UTR and the other encoding mCherry (mCh)::V5::histone H2B::PEST domain::mutant 3x boxB::*tbb-2* 3’UTR. The two transcripts are separated by a *gpd-2* trans-splice site. *gfp* and *mCherry* contain introns (not depicted) and that smFISH probes targeted the *gfp* or *mCherry* coding regions only. Improvements from the previous GFP tethering reporter (Aoki et al. 2018) are noted. **(B)** *nos-3* locus, showing extent of the *q650* deletion and location of inserts of either FLAG or λN::FLAG. Coding regions in dark gray; untranslated regions in light grey. **(C)** Test of tagged NOS-3 functionality in germline development. No single mutants lacking either *nos-3* or *gld-2* alone have a germline tumor (Kadyk and Kimble 1998; Kraemer et al. 1999), but a *nos-3*; *gld-2* double mutant has a germline tumor (Eckmann et al. 2004; Hansen et al. 2004). The *nos-3(q902)* allele, where NOS-3 is tagged with λN::FLAG, behaves like wild-type *nos-3* when *gld-2* is lacking. n, number animals scored. **(D-E)** Quantitation of (D) GFP (αOLLAS) and (E) mCherry (αV5) reporter proteins, as a function of germline position in region bracketed in **Figure 1C**. Bold lines show averages, and dashed lines and shading show one standard deviation (see Methods). Wild-type serves as a negative control. Number animals scored: wild-type (n=54), NOS-3::FLAG (n=34), NOS-3::λN::FLAG (n=52). The same measurements are used to generate graphs in **Figures 1E, 3D,** and **Figure S2**.

**Figure S2**. Supplemental data showing effects of tethered NOS-3 variants on reporter protein expression. Quantitation of GFP (αOLLAS) normalized to mCherry (αV5) reporter proteins, as a function of germline position in region bracketed in **Figure 1C**. Bold lines show averages, and dashed lines and shading show one standard deviation (see Methods). Wild-type serves as a negative control. Quantitation begins at the distal end and goes for 310 μm, stopping near the proximal end of the pachytene region. N2 wild-type serves as a negative control. Each graph reports the ratio of GFP:mCherry protein expression (OLLAS:V5 signal) in **(A)** Wild-type (n=54), NOS-3::FLAG (n=34), or NOS-3::λN::FLAG (n=52) expressing germlines, along with germlines expressing **(B)** NOS-3(∆679-821)::λN::FLAG (n=42), **(C)** NOS-3(∆431-821)::λN::FLAG (n=36), **(D)** NOS-3(∆183-821)::λN::FLAG (n=37), **(E)** NOS-3(∆2-186)::λN::FLAG (n=31), and **(F)** NOS-3(822 STOP)::λN::FLAG (n=37). Same curves and values are included in **Figures 1E, 3D** and **Figure S1D,E**.
