# Supplementary material
Source: HighWire-hosted journal article supplement (doi:10.1101/rna.078693.121)
Supplement: Supplemental_Tables_S1-S4.xlsx [file Supplemental_Tables_S1-S4.xlsx]

## Sheet: Table S1
Table S1. Statistics comparing fluorescent protein ratios in NOS-3 deletion mutants
strain	v. strain	p-value
N2 wild-type	NOS-3:FLAG; dual reporter	<0.0001
"	NOS-3:FLAG:lN; dual reporter	<0.0001
"	NOS-3(∆183-821):FLAG:lN; dual reporter	<0.0001
"	NOS-3(∆431-821):FLAG:lN; dual reporter	<0.0001
"	NOS-3(∆674-821):FLAG:lN; dual reporter	<0.0001
"	NOS-3(∆2-186):FLAG:lN; dual reporter	<0.0001
"	NOS-3 (822 STOP):FLAG:lN; dual reporter	<0.0001
NOS-3:FLAG; dual reporter	NOS-3:FLAG:lN; dual reporter	<0.0001
"	NOS-3(∆183-821):FLAG:lN; dual reporter	<0.0001
"	NOS-3(∆431-821):FLAG:lN; dual reporter	<0.0001
"	NOS-3(∆674-821):FLAG:lN; dual reporter	<0.0001
"	NOS-3(∆2-186):FLAG:lN; dual reporter	<0.0001
"	NOS-3 (822 STOP):FLAG:lN; dual reporter	<0.0001
NOS-3:FLAG:lN; dual reporter	NOS-3(∆183-821):FLAG:lN; dual reporter	<0.0001
"	NOS-3(∆431-821):FLAG:lN; dual reporter	<0.0001
"	NOS-3(∆674-821):FLAG:lN; dual reporter	0.5735
"	NOS-3(∆2-186):FLAG:lN; dual reporter	0.4646
"	NOS-3 (822 STOP):FLAG:lN; dual reporter	<0.0001
NOS-3(∆183-821):FLAG:lN; dual reporter	NOS-3(∆431-821):FLAG:lN; dual reporter	<0.0001
"	NOS-3(∆674-821):FLAG:lN; dual reporter	<0.0001
"	NOS-3(∆2-186):FLAG:lN; dual reporter	<0.0001
"	NOS-3 (822 STOP):FLAG:lN; dual reporter	<0.0001
NOS-3(∆431-821):FLAG:lN; dual reporter	NOS-3(∆674-821):FLAG:lN; dual reporter	<0.0001
"	NOS-3(∆2-186):FLAG:lN; dual reporter	<0.0001
"	NOS-3 (822 STOP):FLAG:lN; dual reporter	<0.0001
NOS-3(∆674-821):FLAG:lN; dual reporter	NOS-3(∆2-186):FLAG:lN; dual reporter	0.1011
"	NOS-3 (822 STOP):FLAG:lN; dual reporter	<0.0001
NOS-3(∆2-186):FLAG:lN; dual reporter	NOS-3 (822 STOP):FLAG:lN; dual reporter	<0.0001

## Sheet: Table S2
Table S2: Strains examined in this study
Strain	Genotype	Citation
N2	wild type, Bristol strain	(Brenner 1974)
JK3026	gld-2(q497)/ hT2[qIs48](I;III)	(Eckmann et al. 2004)
JK3294	gld-2(q497)/ ccIs4251 unc-15(e73) I; nos-3(q650)/ mIn1[mIs14 dpy-10(e128)] II	(Eckmann et al. 2004)
JK6139	nos-3(q940)[3xFLAG::nos-3] II; qSi380[Pmex-5::eGFP::his-58::MODC PEST::tbb-2 3’UTR 3xboxb::gpd-2::mCherry::his-58::MODC PEST::tbb-2 3'UTR mutant 3xboxb::tbb-1 intergenic] IV	This Work
JK6140	nos-3(q902)[nos-3::lN::3xFLAG] II; qSi380[Pmex-5::eGFP::his-58::MODC PEST::tbb-2 3’UTR 3xboxb::gpd-2::mCherry::his-58::MODC PEST::tbb-2 3'UTR mutant 3xboxb::tbb-1 intergenic] IV	This Work
JK6145	gld-2(q497)/ ccIs4251 unc-15(e73) I; nos-3(q902)/ mIn1[mIs14 dpy-10(e128)] II	This Work
JK6268	qSi380[Pmex-5::eGFP::his-58::MODC PEST::tbb-2 3’UTR 3xboxb::gpd-2::mCherry::his-58::MODC PEST::tbb-2 3'UTR mutant 3xboxb::tbb-1 intergenic] IV	This Work
JK6378	nos-3(q1176)[nos-3 (822 STOP*)::lN::3xFLAG] II; qSi380[Pmex-5::eGFP::his-58::MODC PEST::tbb-2 3’UTR 3xboxb::gpd-2::mCherry::his-58::MODC PEST::tbb-2 3'UTR mutant 3xboxb::tbb-1 intergenic] IV. *stop codon added after amino acid 822	This Work
JK6438	nos-3(q1173)[nos-3 (aa ∆674-821)::lN::3xFLAG] II; qSi380[Pmex-5::eGFP::his-58::MODC PEST::tbb-2 3’UTR 3xboxb::gpd-2::mCherry::his-58::MODC PEST::tbb-2 3'UTR mutant 3xboxb::tbb-1 intergenic] IV	This Work
JK6439	nos-3(q1174)[nos-3 (aa ∆431-821)::lN::3xFLAG] II; qSi380[Pmex-5::eGFP::his-58::MODC PEST::tbb-2 3’UTR 3xboxb::gpd-2::mCherry::his-58::MODC PEST::tbb-2 3'UTR mutant 3xboxb::tbb-1 intergenic] IV	This Work
JK6440	nos-3(q1175)[nos-3 (aa ∆183-821)::lN::3xFLAG] II; qSi380[Pmex-5::eGFP::his-58::MODC PEST::tbb-2 3’UTR 3xboxb::gpd-2::mCherry::his-58::MODC PEST::tbb-2 3'UTR mutant 3xboxb::tbb-1 intergenic] IV	This Work
JK6442	nos-3(q1177)[nos-3 (aa ∆2-186)::lN::3xFLAG] II; qSi380[Pmex-5::eGFP::his-58::MODC PEST::tbb-2 3’UTR 3xboxb::gpd-2::mCherry::his-58::MODC PEST::tbb-2 3'UTR mutant 3xboxb::tbb-1 intergenic] IV	This Work
JK6443	nos-3(q902)[nos-3::lN::3xFLAG] II; pgl-1(q980)[pgl-1::3xboxb] IV	This Work
JK6444	nos-3(q940)[nos-3::3xFLAG] II; pgl-1(q980)[pgl-1::3xboxb] IV	This Work

## Sheet: Table S3
Table S3: CRISPR RNAs and repair templates
Name	Gene Targeted	Sequence
crRNAs
nos-3 crRNA 1	nos-3	AACTATAGCCATAGTTATGG
crRNA_JD1	nos-3	TATCAACAAATGGAAAGCGG
crRNA_JD2	nos-3	CCATACGGAATGCCACAAGG
crRNA_JD3	nos-3	GACAAAAACTGAAATAAGCG
crRNA_JD4	nos-3	TATAGCCATTCCTACGGCGG
crRNA_JD5	nos-3	AACGTTCACTTGGTAATGTC
Repair Templates
nos-3 lambda 3xFl repair	nos-3	GTCCACGATAGCTACCAGTAGAATTCTTGTCATCGTCATCCTTGTAATCGATGTCATGATCTTTATAATCACCGTCATGGTCTTTGTAGTCGGATCCTCCGTTGGCGGCCTTCCATTGGGCTTGCTTCTCGGCACGACGCTCACGACGACGGGTACGGGCGTTTCCTCCGCCgTAggaATGGCTATAGTTCTGACCGTAT
nos-3 3xFl repair II	nos-3	GTCCACTGCCTCCACTTCCTCCAGACGATCGTCCACGATAGCTACCAGTAGAATTCTTGTCATCGTCATCCTTGTAATCGATGTCATGATCTTTATAATCACCGTCATGGTCTTTGTAGTCGCCgTAggaATGGCTATAGTTCTGACCGTATCCTCTACCGCCACTGCGATTTTCTGAATTGTGACGAGATTTATGTGAC
prJD23	nos-3	CTCACGACGACGGGTACGGGCGTTTCCTCCCATTTGTTGATACTGctgaaaataaagaat
prJD24	nos-3	CTCACGACGACGGGTACGGGCGTTTCCTCCCATTCCGTATGGTTGCATTTGctgaaacat
prJD25	nos-3	CTCACGACGACGGGTACGGGCGTTTCCTCCTATTTCAGTTTTTGTCGCTTCGATAGATGC
prJD40	nos-3	TGTTGTCATCCGCGTATCCACTTGGCGGCATtaccaagtgaacgttgactgtaaatgttg
prJD44	nos-3	ACGACGGGTACGGGCGTTTCCTCCGCTTCCCATtaccaagtgaacgttgactgtaaatgt
prJD45	nos-3	TCCACGATAGCTACCAGTAGAATTACTTGTCATCGTCATCCTTGTAATCGATGTCATGATCTTTATAATCACCGTCATGGTCTTTGTAGTCGGATCCTCCGTTGGCGGCCTTCCATTGGGCTTGCTTCTCGGCACGACGCTCACGACGACGGGTACGGGCGTTTCCTCCGCCgTAggaATGGCTATAGTTCTGACCGTAT
pgl-1 boxb repair	pgl-1	ggggtcgtggtggacgcggaggtttctaaactcCAACTACTAAACTGATTCCTGGGCCCTGAAGAAGGGCCCCTCGACTAAGTCCAACTACTAAACTGGGCCCTGAAGAAGGGCCCATATAGGGCCCTGAAGAAGGGCCCTATCGAGGATATTATCTCGAcaactattgaatgtttaatttgttttttaagtatacactt

## Sheet: Table S4
Table S4: smFISH probes
GFP (C610)	mCherry (Quasar 570)
aattgggacaactccagtga	tcttcttcaccctttgagac
catcaccatctaattcaaca	ctctttaataattgccatgt
acagaaaatttgtgcccatt	tatgcaccttgaaacgcata
atcaccttcaccctctccac	tgcccattgacagatccctc
gggtaagttttccgtatgtt	ttcaccttcaatttcaaact
ccagtagtgcaaataaattt	cctcatatggtcggccttct
tacccatggaacaggtagtt	tttagttttgcggtttgtgt
ttagtatatatatgtttaaa	tatatatatgtttaaactta
aaatttaaataatcagggtt	ttaaataatcagggttagtt
agtagtgacaagtgttggct	ccgcctttagttacctgaaa
agcattgaacaccataacag	gtcccaggcgaatggtaatg
atatgatctgggtatctcga	acatgaactgtggagagagg
cttgaaaaagtcatgccgtt	ttaacataagctttacttcc
cataaccttcgggcatggca	atctggtatatctgccggat
aaaaatatagttctttcctg	ccgggaatgaaagtttcaaa
cttgtagttcccgtcatctt	acgcgttcccacttaaaacc
cgaactgtttaaacttacgt	tcctccgtcttcaaaattca
aatatgtatggttagttagt	agtcttgcgtcactgtaaca
gacttcagcacctgaaaatt	cgaactgtttaaacttacct
caagggtatcaccttcaaac	aatatgtatggttagttagt
ccttttaactcgattctatt	catcttggaggctgaaaatt
tccatcttctttaaaatcaa	ttgactttataaataaattc
ccaatttgtgtccaagaatg	ggggaaattcgttcctcgaa
ttgtgtgagttatagttgta	ttctgcataacaggtccatc
tttgtctgccatgatgtata	agcttcccatcccatagtct
caactttgattccattcttt	cagggtacattctttcactt
agtaaaatcatgtttaaact	tctcccttaagagcaccgtc
atttaaatcagattagttag	caatttaagacgttgtttaa
gtctaattttgaagttctga	catcgtaatgtcctccatct
aacgcttccatcttcaatgt	atcatgtttaaacttacctc
gttgataatggtctgctagt	atcagattagttagttagta
ccatcgccaattggagtatt	ttgtcttcacctgaaaattt
ggttgtctggtaaaaggaca	actggttttttggctttgta
aagggcagattgtgtggaca	attgtacgctcctggcagct
tcttttcgttgggatctttc	tgatatccagtttaatatta
tcaagaaggaccatgtggtc	gtgtaatcctcgttgtggga
aatcccagcagctgttacaa	tctttcatattgctcaacga
tatagttcatccatgccatg	ctgtcgagtgccgcccttca
	ttatacaattcatccatgcc
